# Supplementary material for: Impact of mixed biofilm formation with environmental microorganisms on E. coli O157:H7 survival against sanitization
Source: PubMed Central journal article supplement (PMC7560865; doi:10.1038/s41538-020-00076-x), 2020-10-14
Supplement: 41538_2020_76_MOESM1_ESM.pdf [file 41538_2020_76_MOESM1_ESM.pdf]

**Supplementary Table 1**

| <b>Biofilm ID</b> | <b>X (μm)</b> | <b>Y (μm)</b> | <b>Z (μm)</b> |
|-------------------|---------------|---------------|---------------|
| AC1               | 212.12        | 212.12        | 69.75         |
| AC1+ O157:H7      | 212.12        | 212.12        | 157.55        |
| AC2               | 212.12        | 212.12        | 30            |
| AC2+ O157:H7      | 212.12        | 212.12        | 49.25         |
| AH1               | 212.12        | 212.12        | 34.60         |
| AH1+ O157:H7      | 212.12        | 212.12        | 20.25         |
| AH2               | 212.12        | 212.12        | 22.20         |
| AH2+ O157:H7      | 212.12        | 212.12        | 55.47         |
| BC1               | 212.12        | 212.12        | 89.75         |
| BC1+ O157:H7      | 212.12        | 212.12        | 94.30         |
| BC2               | 212.12        | 212.12        | 35.1          |
| BC2+ O157:H7      | 212.12        | 212.12        | 42.6          |
| BH1               | 212.12        | 212.12        | 73.65         |
| BH1+ O157:H7      | 212.12        | 212.12        | 91.16         |
| BH2               | 212.12        | 212.12        | 20.19         |
| BH2+ O157:H7      | 212.12        | 212.12        | 24            |

Supplementary Table 2 (part 1)

| Organism                                                                         | AC1 | AC1_300 | AC1_O157_300 | AC2 | AC2_300 | AC2_O157_300 | AH1 | AH1_300 | AH1_O157_300 | AH2 | AH2_300 | AH2_O157_300 |
|----------------------------------------------------------------------------------|-----|---------|--------------|-----|---------|--------------|-----|---------|--------------|-----|---------|--------------|
| Actinobacteria;c_Actinobacteria;o_Actinomycetales;f_Microbacteriaceae            | y   | y       | y            |     |         |              |     |         |              |     |         |              |
| Actinobacteria;c_Actinobacteria;o_Actinomycetales;f_Micrococcaceae               | y   | y       | y            |     |         |              | y   | y       | y            | y   | y       | y            |
| Actinobacteria;c_Actinobacteria;o_Actinomycetales;f_Nocardiaceae                 |     |         |              |     |         |              |     |         |              |     |         |              |
| Bacteroidetes;c_Flavobacteria;o_Flavobacteriales;f_Flavobacteriaceae             | y   | y       | y            |     |         |              |     |         |              | y   | y       |              |
| Bacteroidetes;c_Flavobacteria;o_Flavobacteriales;f_[Weeksellaceae]               | y   | y       | y            | y   | y       | y            | y   | y       | y            |     |         |              |
| Bacteroidetes;c_Sphingobacteria;o_Sphingobacteriales;f_Sphingobacteriaceae       | y   | y       | y            | y   | y       | y            | y   | y       | y            |     |         |              |
| Firmicutes;c_Bacilli;o_Bacillales;f_Listeriaceae                                 | y   | y       | y            |     |         |              | y   | y       | y            | y   | y       | y            |
| Firmicutes;c_Bacilli;o_Lactobacillales;f_Carnobacteriaceae                       | y   | y       | y            |     |         |              | y   | y       | y            | y   | y       | y            |
| Firmicutes;c_Bacilli;o_Lactobacillales;f_Enterococcaceae                         | y   | y       | y            |     |         |              | y   | y       | y            | y   | y       | y            |
| Firmicutes;c_Bacilli;o_Lactobacillales;f_Lactobacillaceae                        |     |         |              |     |         |              |     |         |              | y   | y       | y            |
| Firmicutes;c_Bacilli;o_Lactobacillales;f_Leuconostocaceae                        |     |         |              |     |         |              |     |         |              | y   | y       | y            |
| Firmicutes;c_Bacilli;o_Lactobacillales;f_Streptococcaceae                        | y   | y       | y            |     |         |              | y   | y       | y            | y   | y       | y            |
| Firmicutes;c_Clostridia;o_Clostridiales;f_Clostridiaceae                         |     |         |              |     |         |              |     |         |              |     |         |              |
| Firmicutes;c_Erysipelotrichi;o_Erysipelotrichales;f_Erysipelotrichaceae          | y   | y       | y            |     |         |              |     |         |              |     |         |              |
| Proteobacteria;c_Alphaproteobacteria;o_Rhizobiales;f_Bradyrhizobiaceae           |     |         |              |     |         |              |     |         |              |     |         |              |
| Proteobacteria;c_Alphaproteobacteria;o_Rhizobiales;f_Brucellaceae                | y   | y       | y            | y   | y       | y            | y   | y       | y            |     |         |              |
| Proteobacteria;c_Alphaproteobacteria;o_Rhizobiales;f_Rhizobiaceae                | y   | y       | y            |     |         |              |     |         |              |     |         |              |
| Proteobacteria;c_Alphaproteobacteria;o_Sphingomonadales;f_Sphingomonadaceae      | y   | y       | y            |     |         |              |     |         |              |     |         |              |
| Proteobacteria;c_Betaproteobacteria;o_Burkholderiales;f_Comamonadaceae           | y   | y       | y            |     |         |              |     |         |              |     |         |              |
| Proteobacteria;c_Betaproteobacteria;o_Burkholderiales;f_Oxalobacteraceae         | y   | y       | y            |     |         |              | y   | y       | y            | y   | y       | y            |
| Proteobacteria;c_Betaproteobacteria;o_Neisseriales;f_Neisseriaceae               |     |         |              |     |         |              | y   | y       | y            |     |         |              |
| Proteobacteria;c_Epsilonproteobacteria;o_Campylobacteriales;f_Campylobacteraceae |     |         |              |     |         |              |     |         |              |     |         |              |
| Proteobacteria;c_Gammaproteobacteria;o_Aeromonadales;f_Aeromonadaceae            | v   | v       | v            |     |         |              |     |         |              |     |         |              |
| Proteobacteria;c_Gammaproteobacteria;o_Alteromonadales;f_Shewanellaceae          | v   | v       | v            |     |         |              |     |         |              |     |         |              |
| Proteobacteria;c_Gammaproteobacteria;o_Enterobacteriales;f_Enterobacteriaceae    | y   | y       | y            | y   | y       | y            | y   | y       | y            | y   | y       | y            |
| Proteobacteria;c_Gammaproteobacteria;o_Pseudomonadales;f_Moraxellaceae           | y   | y       | y            | y   | y       | y            | y   | y       | y            | y   | y       | y            |
| Proteobacteria;c_Gammaproteobacteria;o_Pseudomonadales;f_Pseudomonadaceae        | y   | y       | y            | y   | y       | y            | y   | y       | y            | y   | y       | y            |

Unique Families

Shared families in samples that were strong O157:H7 protectors

Shared families in samples that were weak O157:H7 protectors

Supplementary Table 2 (part 2)

| Organism                                                                         | BC1 | BC1_300 | BC1_O157_300 | BC2 | BC2_300 | BC2_O157_300 | BH1 | BH1_300 | BH1_O157_300 | BH2 | BH2_300 | BH2_O157_300 |
|----------------------------------------------------------------------------------|-----|---------|--------------|-----|---------|--------------|-----|---------|--------------|-----|---------|--------------|
| Actinobacteria;c_Actinobacteria;o_Actinomycetales;f_Microbacteriaceae            |     |         |              |     |         |              |     |         |              |     |         |              |
| Actinobacteria;c_Actinobacteria;o_Actinomycetales;f_Micrococcaceae               |     |         |              | y   | y       | y            | y   | y       | y            |     |         |              |
| Actinobacteria;c_Actinobacteria;o_Actinomycetales;f_Nocardiaceae                 | y   | y       | y            |     |         |              |     |         |              |     |         |              |
| Bacteroidetes;c_Flavobacteria;o_Flavobacteriales;f_Flavobacteriaceae             | y   | y       |              | y   | y       | y            | y   | y       | y            | y   | y       | y            |
| Bacteroidetes;c_Flavobacteria;o_Flavobacteriales;f_[Weeksellaceae]               |     |         |              |     |         |              |     |         |              |     |         |              |
| Bacteroidetes;c_Sphingobacteria;o_Sphingobacteriales;f_Sphingobacteriaceae       |     |         |              |     |         |              |     |         |              |     |         |              |
| Firmicutes;c_Bacilli;o_Bacillales;f_Listeriaceae                                 |     |         |              |     |         |              |     |         |              |     |         |              |
| Firmicutes;c_Bacilli;o_Lactobacillales;f_Carnobacteriaceae                       |     | y       | y            | y   | y       | y            | y   | y       | y            |     |         |              |
| Firmicutes;c_Bacilli;o_Lactobacillales;f_Enterococcaceae                         |     |         |              |     |         |              | y   | y       | y            |     |         |              |
| Firmicutes;c_Bacilli;o_Lactobacillales;f_Lactobacillaceae                        |     |         |              | y   | y       | y            | y   | y       | y            | y   | y       | y            |
| Firmicutes;c_Bacilli;o_Lactobacillales;f_Leuconostocaceae                        |     |         |              | y   | y       | y            | y   | y       | y            | y   | y       | y            |
| Firmicutes;c_Bacilli;o_Lactobacillales;f_Streptococcaceae                        |     |         |              | y   | y       | y            | y   | y       | y            |     | y       | y            |
| Firmicutes;c_Clostridia;o_Clostridiales;f_Clostridiaceae                         |     |         |              |     |         |              |     |         |              | y   | y       |              |
| Firmicutes;c_Erysipelotrichi;o_Erysipelotrichales;f_Erysipelotrichaceae          |     |         |              |     |         |              |     |         |              |     |         |              |
| Proteobacteria;c_Alphaproteobacteria;o_Rhizobiales;f_Bradyrhizobiaceae           |     |         |              |     |         |              |     |         |              | y   |         |              |
| Proteobacteria;c_Alphaproteobacteria;o_Rhizobiales;f_Brucellaceae                |     |         |              |     |         |              |     |         |              |     |         |              |
| Proteobacteria;c_Alphaproteobacteria;o_Rhizobiales;f_Rhizobiaceae                |     |         |              |     |         |              |     |         |              |     |         |              |
| Proteobacteria;c_Alphaproteobacteria;o_Sphingomonadales;f_Sphingomonadaceae      |     |         |              |     |         |              |     |         |              |     |         |              |
| Proteobacteria;c_Betaproteobacteria;o_Burkholderiales;f_Comamonadaceae           |     |         |              |     |         |              |     |         |              |     |         |              |
| Proteobacteria;c_Betaproteobacteria;o_Burkholderiales;f_Oxalobacteraceae         | y   | y       | y            |     | y       | y            |     |         |              | y   | y       | y            |
| Proteobacteria;c_Betaproteobacteria;o_Neisseriales;f_Neisseriaceae               |     |         |              |     |         |              |     |         |              |     |         |              |
| Proteobacteria;c_Epsilonproteobacteria;o_Campylobacteriales;f_Campylobacteraceae | y   | y       | y            |     |         |              |     |         |              |     |         |              |
| Proteobacteria;c_Gammaproteobacteria;o_Aeromonadales;f_Aeromonadaceae            |     |         |              |     |         |              |     |         |              |     |         |              |
| Proteobacteria;c_Gammaproteobacteria;o_Alteromonadales;f_Shewanellaceae          |     |         |              |     |         |              |     |         |              |     |         |              |
| Proteobacteria;c_Gammaproteobacteria;o_Enterobacteriales;f_Enterobacteriaceae    | y   | y       | y            | y   | y       | y            | y   | y       | y            | y   | y       | y            |
| Proteobacteria;c_Gammaproteobacteria;o_Pseudomonadales;f_Moraxellaceae           | y   | y       |              | y   | y       | y            | y   | y       | y            | y   | y       | y            |
| Proteobacteria;c_Gammaproteobacteria;o_Pseudomonadales;f_Pseudomonadaceae        | y   | y       | y            | y   | y       | y            | y   | y       | y            | y   | y       | y            |

Unique Families

Shared families in samples that were strong O157:H7 protectors

Shared families in samples that were weak O157:H7 protectors

## Supplementary Figure 1

Examples of drain types samples collected from.

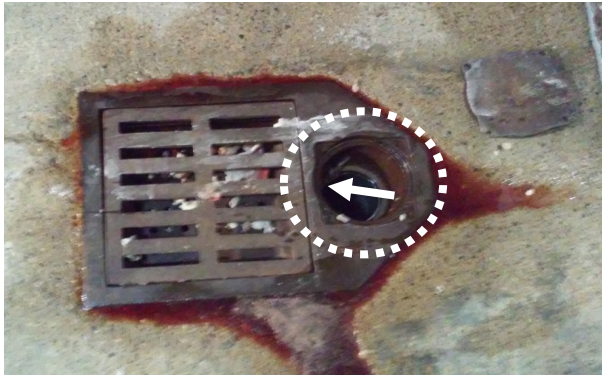

A. Side trap drain with cleanout cover removed (A10, A11).

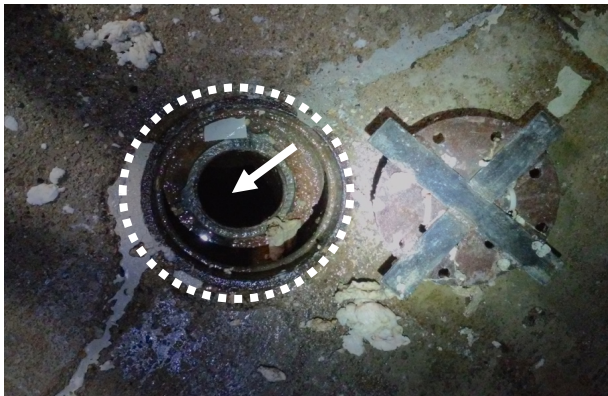

B. Standard industrial drain with top grate removed (A8, A9).

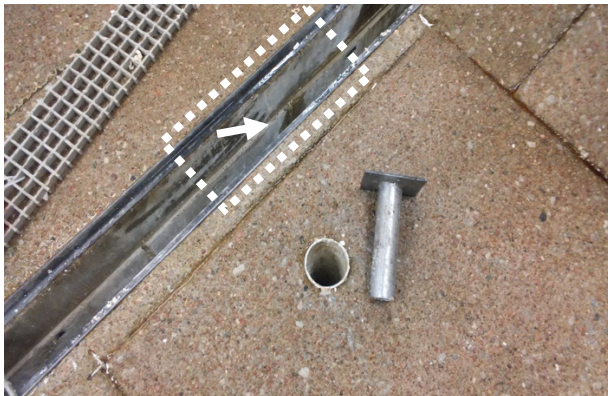

C. Trench drain with grate removed and cleanout opened (B8, B9, B10, B11).

Areas sampled are indicated by dashed line, with arrow indicating interior surfaces targeted for biofilm collection. Hotbox drain samples from Plant A were collected from side trap drains, while cooler drain samples were collected from standard drains. All drain samples from Plant B were collected from trench drains.
